# Supplementary material for: Enhancing the Quality of Rivaroxaban Exposure Estimates Using Prothrombin Time in the Absence of Pharmacokinetic Sampling
Source: PubMed Central journal article supplement — CPT Pharmacometrics Syst Pharmacol. 2019 Jul 5;8(11):805–14. doi: 10.1002/psp4.12444 (PMC6875705; doi:10.1002/psp4.12444), 2019-07-05

**Figure S1** Overview of the derivation (a) and application (b) of the  $\eta$  approach.

## $\eta$ approach

### A. Derivation

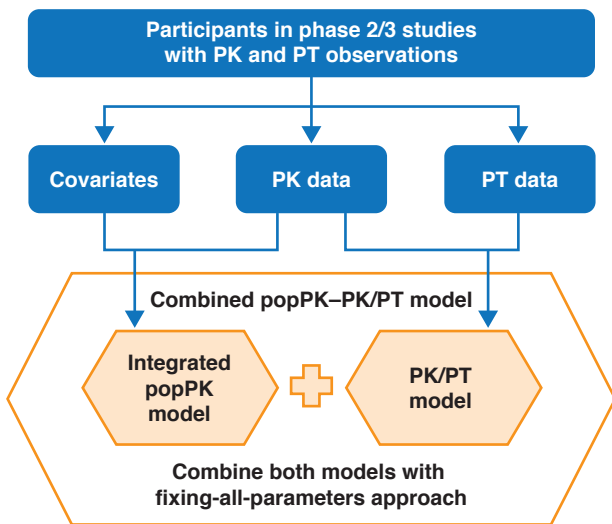

### B. Application

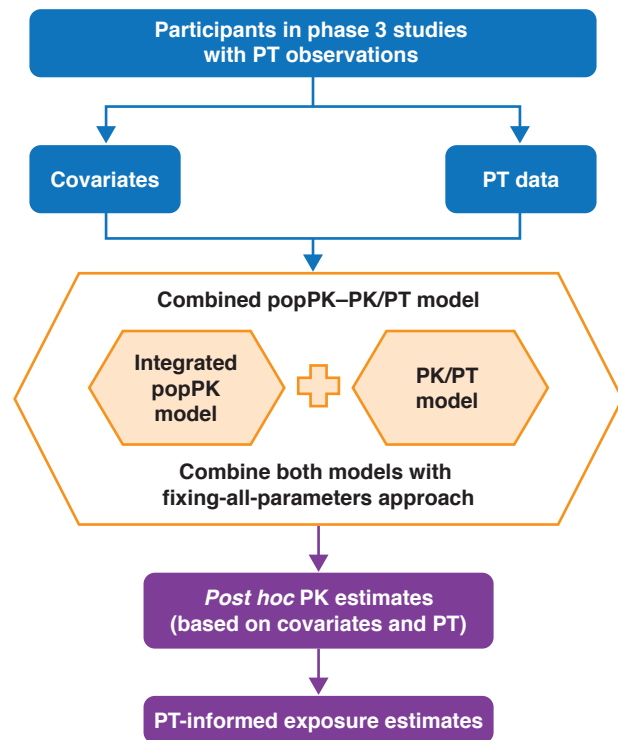

Supplement: PSP4-8-805-s001.pdf [file PSP4-8-805-s001.pdf]
