# Supplementary material for: Enhancing the Quality of Rivaroxaban Exposure Estimates Using Prothrombin Time in the Absence of Pharmacokinetic Sampling
Source: PubMed Central journal article supplement — CPT Pharmacometrics Syst Pharmacol. 2019 Jul 5;8(11):805–14. doi: 10.1002/psp4.12444 (PMC6875705; doi:10.1002/psp4.12444), 2019-07-05
Supplement: PSP4-8-805-s002.pdf [file PSP4-8-805-s002.pdf]

**Figure S2** Time-matched PK, PT samples from the PK–PT dataset<sup>a</sup>. The blue shaded area represents the 95% confidence band of the LOESS regression. The red line represents the estimated linear relationship. The grey shaded area represents the area where the lower and upper 2.5% of data are located. The vertical dashed line shows the upper 99<sup>th</sup> percentile of observed concentrations for patients receiving 20 mg rivaroxaban.

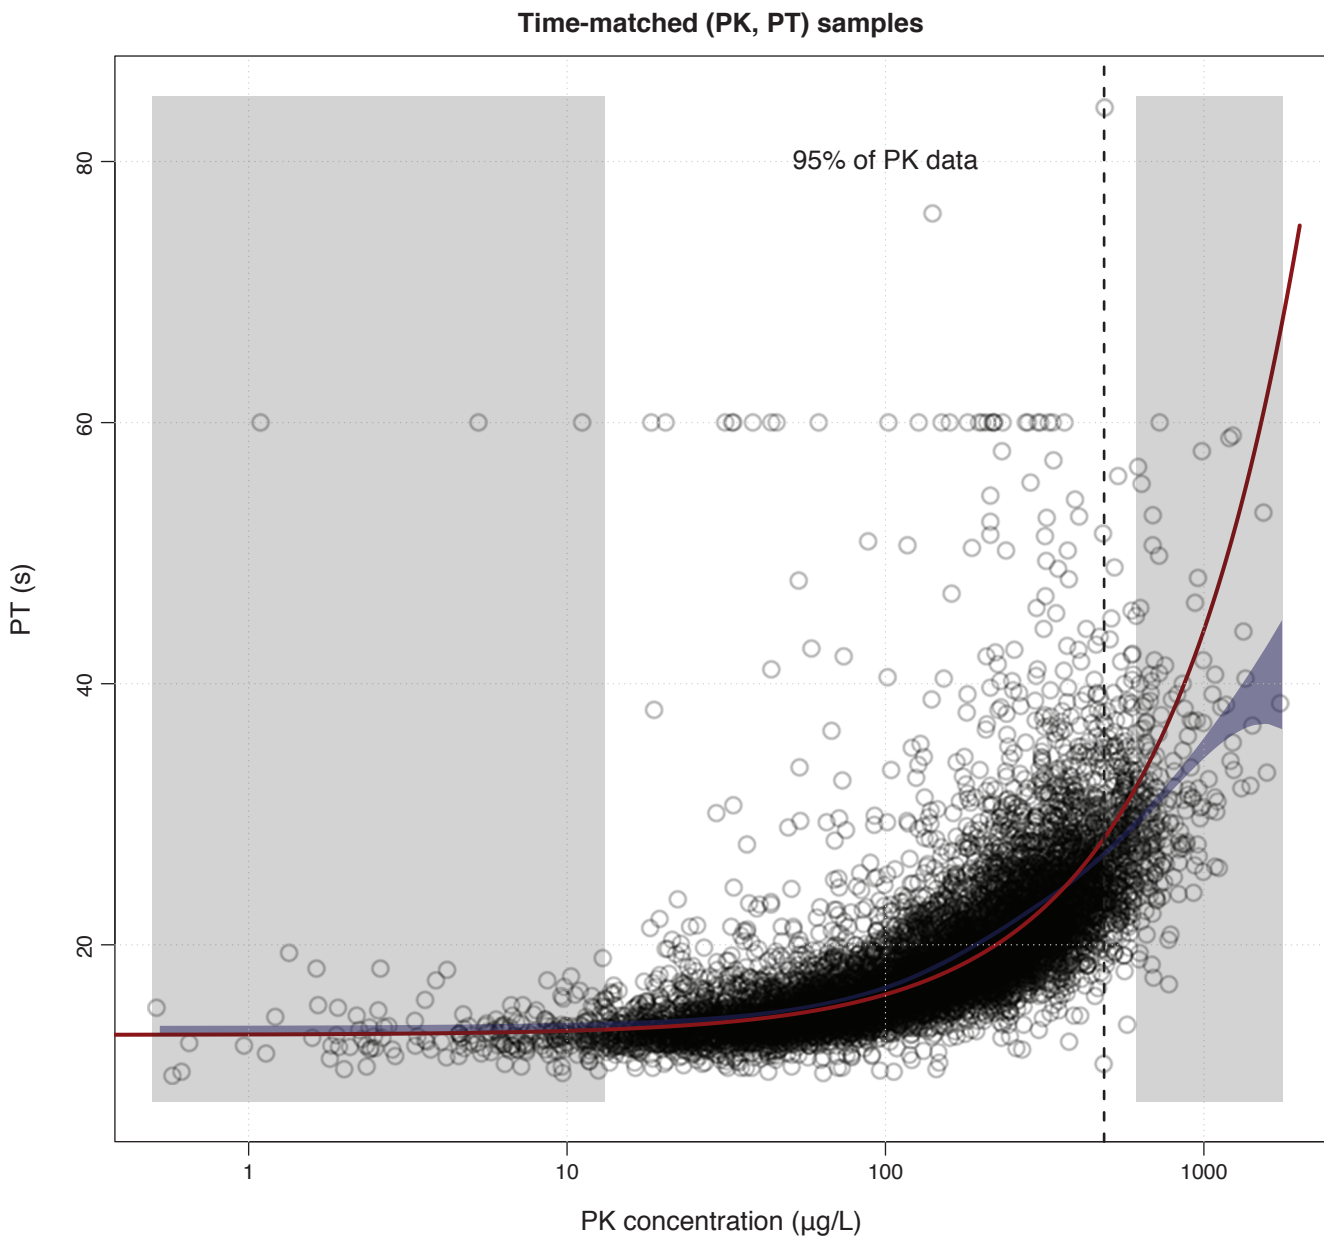

PK, pharmacokinetic, PT, prothrombin time.

<sup>a</sup>The PK/PT relationship was assessed using the population PK–PT dataset. Inspection of time-matched PK, PT samples revealed a strong association between PK and PT, where PT increases with increasing PK concentration. The relationship seems to follow a direct linear correlation with a saturation of the PK/PT effect only at the highest observed rivaroxaban plasma concentrations. Hence, a linear model was assumed to be appropriate.

The model is given by

$$PT(t) = (PT_0 + PT_1 \text{Conc}(t)) \cdot (1 + \varepsilon),$$

with  $PT_0 = \theta_0 \exp(\eta_0)$  and  $PT_1 = \theta_1 \exp(\eta_1)$ , where  $\text{Conc}(t)$  is the predicted rivaroxaban plasma concentration using the final population PK model;  $\theta_0$  and  $\theta_1$  represent the typical baseline and slope parameter of the linear relationship, respectively;  $\eta_0$  and  $\eta_1$  represent the associated inter-individual variability terms assumed to be normally distributed (with mean 0); and  $\varepsilon$  represents the proportional residual error term, assumed to be normally distributed (with mean 0). No covariate analysis on the PK/PT relationship was conducted. PT baseline and slope were estimated (RSE% in brackets) as 13.1 s (0.27%) and 0.031 s/µg/L (1.11%), with IIV of CV% 7.76 (13%) and CV% 38.2 (9.5%), respectively, and a residual unexplained error of CV% 11.4 (12.8%). Due to the small IIV at baseline – actually smaller than the estimated residual unexplained variability for the PT data, the individual baseline values in the Phase 3 studies were also not used to enhance the PT-adjusted exposure.
