# Supplementary material for: Enhancing the Quality of Rivaroxaban Exposure Estimates Using Prothrombin Time in the Absence of Pharmacokinetic Sampling
Source: PubMed Central journal article supplement — CPT Pharmacometrics Syst Pharmacol. 2019 Jul 5;8(11):805–14. doi: 10.1002/psp4.12444 (PMC6875705; doi:10.1002/psp4.12444), 2019-07-05
Supplement: PSP4-8-805-s004.pdf [file PSP4-8-805-s004.pdf]

**Figure S4** Absolute bias of the  $\eta$  approach vs the PT covariate approach in predicting prediction-corrected  $AUC_{0-24}$ . Solid red line indicates the identity line.

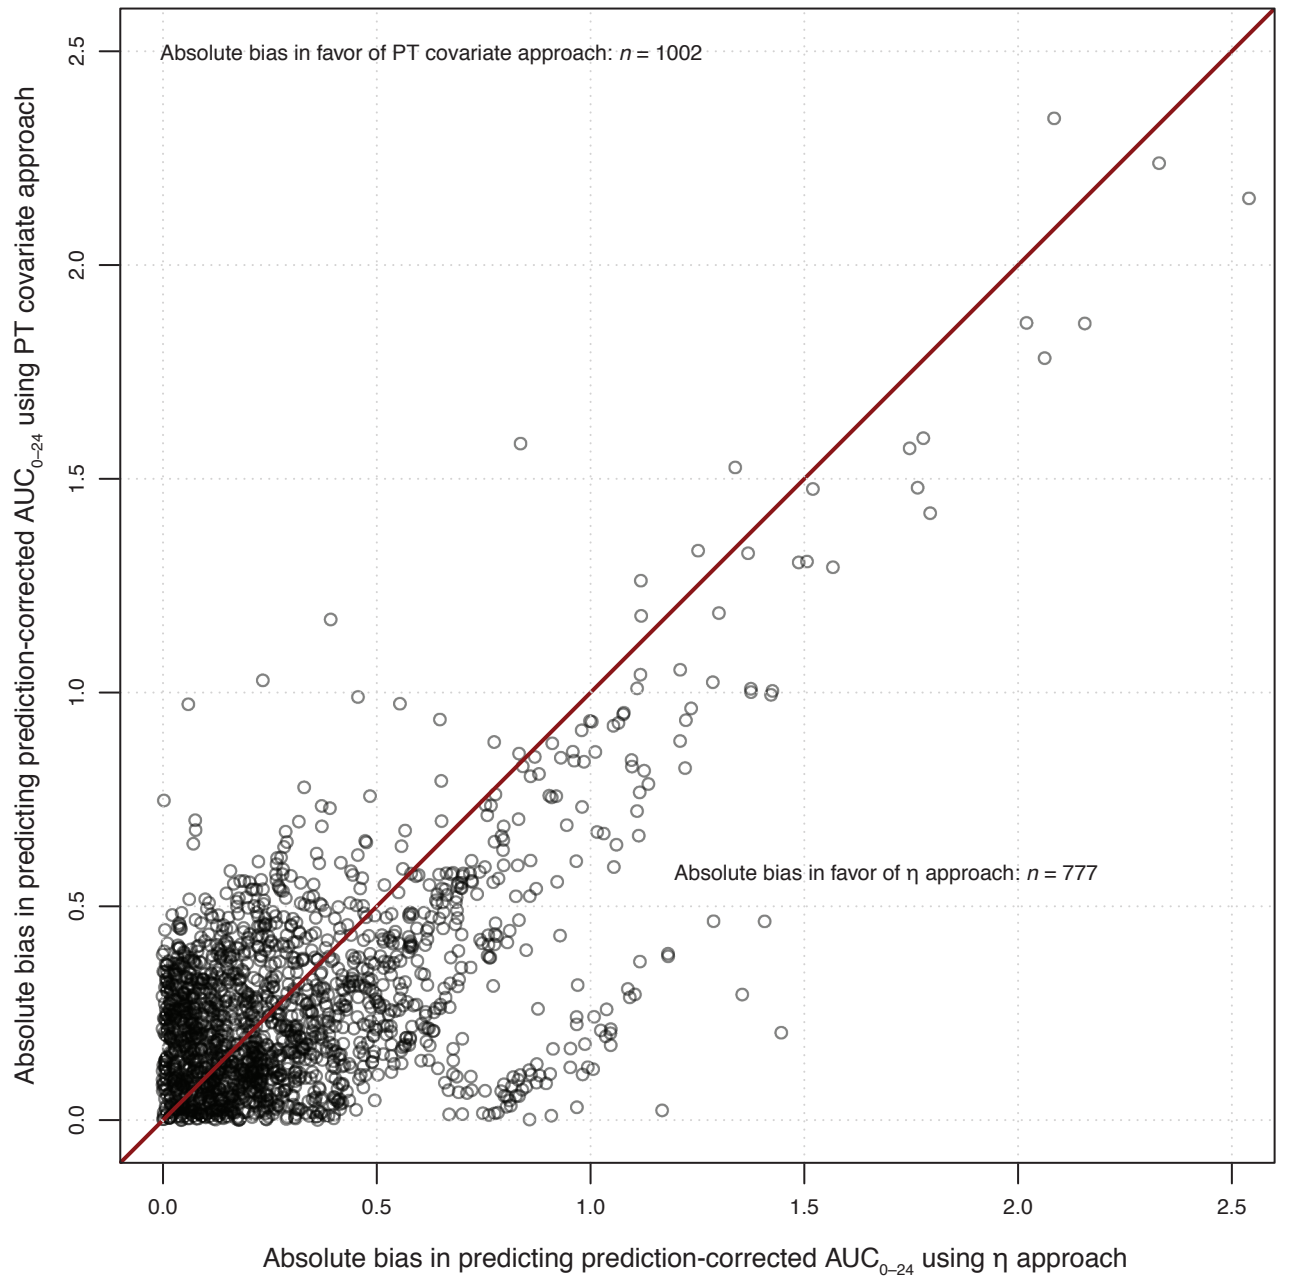

$AUC_{0-24}$ , area under the plasma concentration–time curve from 0 to 24 h; PT, prothrombin time.
