# Supplementary material for: Enhancing the Quality of Rivaroxaban Exposure Estimates Using Prothrombin Time in the Absence of Pharmacokinetic Sampling
Source: PubMed Central journal article supplement — CPT Pharmacometrics Syst Pharmacol. 2019 Jul 5;8(11):805–14. doi: 10.1002/psp4.12444 (PMC6875705; doi:10.1002/psp4.12444), 2019-07-05
Supplement: PSP4-8-805-s005.pdf [file PSP4-8-805-s005.pdf]

**Figure S5** The observed and expected PT values (a), and the covariate-only and PT-adjusted estimates for  $AUC_{0-24}$  (b),  $C_{max}$  (c), and  $C_{trough}$  (d) in the phase 3 EINSTEIN-DVT study. In panel a, the valid PT data are from the 20 mg o.d. dosing period of the phase 3 trial. Values for two individual patients, for whom PT adjustment led to a notable increase (purple) or decrease (orange) in exposure, are also shown as examples.

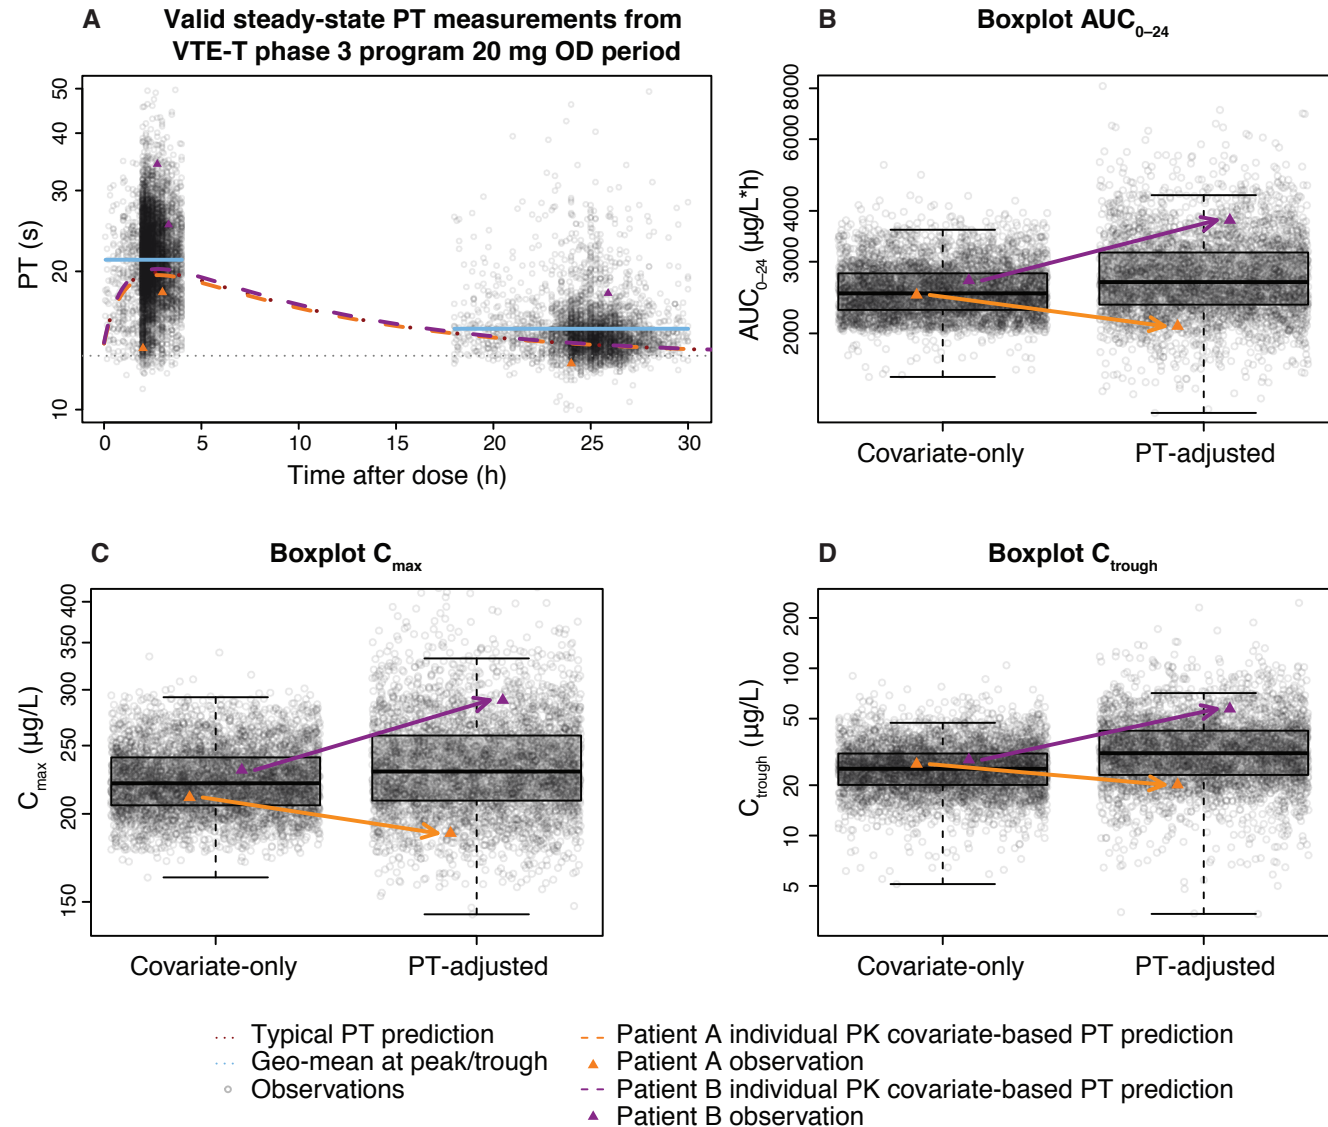

$AUC_{0-24}$ , area under the plasma concentration–time curve from 0 to 24 h;  $C_{max}$ , maximum concentration;  $C_{trough}$ , trough concentration at the end of the dosing interval before the next dose; DVT, deep vein thrombosis; o.d., once a day; PK, pharmacokinetic; PT, prothrombin time; VTE-T, venous thromboembolism treatment.
