# Supplementary material for: Enhancing the Quality of Rivaroxaban Exposure Estimates Using Prothrombin Time in the Absence of Pharmacokinetic Sampling
Source: PubMed Central journal article supplement — CPT Pharmacometrics Syst Pharmacol. 2019 Jul 5;8(11):805–14. doi: 10.1002/psp4.12444 (PMC6875705; doi:10.1002/psp4.12444), 2019-07-05
Supplement: PSP4-8-805-s006.pdf [file PSP4-8-805-s006.pdf]

**Table S1** Range of exposure estimates based on the covariate-only model, including PT adjustment, and used in the exposure-response analysis in the AF indication

| <b>Exposure measure</b>      |                                  | <b>N</b> | <b>Median</b> | <b>Mean</b> | <b>Coefficient of variation</b> | <b>Minimum</b> | <b>Maximum</b> |
|------------------------------|----------------------------------|----------|---------------|-------------|---------------------------------|----------------|----------------|
| AUC <sub>0-24</sub> (µg/L*h) | Exposure based on covariates     | 7111     | 3312.89       | 3330.41     | 11.19                           | 1803.77        | 9080.76        |
|                              | Exposure PT-adjusted             | 5681     | 3411.77       | 3609.78     | 27.93                           | 1540.54        | 9579.15        |
|                              | Exposure used in ER <sup>a</sup> | 7111     | 3379.37       | 3555.45     | 25.99                           | 1540.54        | 9579.15        |
| C <sub>max</sub> (µg/L)      | Exposure based on covariates     | 7111     | 252.38        | 253.22      | 8.06                            | 186.84         | 475.12         |
|                              | Exposure PT-adjusted             | 5681     | 256.67        | 265.05      | 18.49                           | 151.87         | 617.45         |
|                              | Exposure used in ER <sup>a</sup> | 7111     | 255.46        | 262.69      | 17.13                           | 151.87         | 617.45         |
| C <sub>trough</sub> (µg/L)   | Exposure based on covariates     | 7111     | 47.23         | 48.36       | 26.25                           | 10.19          | 272.77         |
|                              | Exposure PT-adjusted             | 5681     | 55.29         | 63.26       | 55.79                           | 4.99           | 347.39         |
|                              | Exposure used in ER <sup>a</sup> | 7111     | 52.55         | 60.36       | 54.04                           | 4.99           | 347.39         |

AF, atrial fibrillation; AUC<sub>0-24</sub>, area under the plasma concentration–time curve from 0 to 24 h; C<sub>max</sub>, maximum concentration; C<sub>trough</sub>, trough concentration at the end of the dosing interval before the next dose; ER, exposure-response; PT, prothrombin time.

<sup>a</sup>For patients with PT data, the PT-adjusted exposure estimate was used in the ER analysis; in cases where there were no PT data, and therefore PT adjustment could not be performed, covariate-only estimates were used.
