# Supplementary material for: Enhancing the Quality of Rivaroxaban Exposure Estimates Using Prothrombin Time in the Absence of Pharmacokinetic Sampling
Source: PubMed Central journal article supplement — CPT Pharmacometrics Syst Pharmacol. 2019 Jul 5;8(11):805–14. doi: 10.1002/psp4.12444 (PMC6875705; doi:10.1002/psp4.12444), 2019-07-05
Supplement: PSP4-8-805-s007.pdf [file PSP4-8-805-s007.pdf]

**Table S2** Range of exposure estimates based on the covariate-only model, including PT adjustment, and used in the exposure–response analysis in patients undergoing hip or knee replacement surgery

| <b>Exposure measure</b>      |                                  | <b>N</b> | <b>Median</b> | <b>Mean</b> | <b>Coefficient of variation</b> | <b>Minimum</b> | <b>Maximum</b> |
|------------------------------|----------------------------------|----------|---------------|-------------|---------------------------------|----------------|----------------|
| AUC <sub>0–24</sub> (µg/L*h) | Exposure based on covariates     | 6097     | 1143.31       | 1164.50     | 13.76                           | 724.04         | 3699.92        |
|                              | Exposure PT-adjusted             | 5293     | 1220.99       | 1275.24     | 23.01                           | 609.19         | 3649.68        |
|                              | Exposure used in ER <sup>a</sup> | 6097     | 1211.07       | 1264.60     | 22.39                           | 609.19         | 3649.68        |
| C <sub>max</sub> (µg/L)      | Exposure based on covariates     | 6097     | 123.14        | 123.55      | 8.58                            | 92.86          | 216.17         |
|                              | Exposure PT-adjusted             | 5293     | 127.73        | 130.46      | 14.70                           | 87.62          | 278.09         |
|                              | Exposure used in ER <sup>a</sup> | 6097     | 127.17        | 129.65      | 14.24                           | 87.62          | 278.09         |
| C <sub>trough</sub> (µg/L)   | Exposure based on covariates     | 6097     | 5.76          | 6.33        | 55.00                           | 0.58           | 92.15          |
|                              | Exposure PT-adjusted             | 5293     | 7.14          | 8.39        | 66.61                           | 0.78           | 99.74          |
|                              | Exposure used in ER <sup>a</sup> | 6097     | 7.03          | 8.21        | 66.57                           | 0.58           | 99.74          |

AUC<sub>0–24</sub>, area under the plasma concentration–time curve from 0 to 24 h; C<sub>max</sub>, maximum concentration; C<sub>trough</sub>, trough concentration at the end of the dosing interval before the next dose; ER, exposure–response; PT, prothrombin time.

<sup>a</sup>For patients with PT data, the PT-adjusted exposure estimate was used in the ER analysis; in cases where there were no PT data, and therefore PT adjustment could not be performed, covariate-only estimates were used.
