# Supplementary material for: Enhancing the Quality of Rivaroxaban Exposure Estimates Using Prothrombin Time in the Absence of Pharmacokinetic Sampling
Source: PubMed Central journal article supplement — CPT Pharmacometrics Syst Pharmacol. 2019 Jul 5;8(11):805–14. doi: 10.1002/psp4.12444 (PMC6875705; doi:10.1002/psp4.12444), 2019-07-05
Supplement: PSP4-8-805-s008.pdf [file PSP4-8-805-s008.pdf]

**Table S3** Range of exposure estimates based on the covariate-only model, including PT adjustment, and used in the exposure-response analysis in patients receiving treatment for VTE

| <b>Rivaroxaban treatment</b> | <b>Exposure measure</b>         |                                  | <b>N</b> | <b>Median</b> | <b>Mean</b> | <b>Coefficient of variation</b> | <b>Minimum</b> | <b>Maximum</b> |
|------------------------------|---------------------------------|----------------------------------|----------|---------------|-------------|---------------------------------|----------------|----------------|
| 15 mg b.d.                   | AUC <sub>0-24</sub><br>(µg/L*h) | Exposure based on covariates     | 4130     | 4082.78       | 4220.14     | 17.42                           | 2536.17        | 15 227.05      |
|                              |                                 | Exposure PT-adjusted             | 3582     | 4346.50       | 4602.69     | 25.46                           | 2069.23        | 17 603.20      |
|                              |                                 | Exposure used in ER <sup>a</sup> | 4130     | 4318.28       | 4566.49     | 25.27                           | 2069.23        | 17 603.20      |
|                              | C <sub>max</sub> (µg/L)         | Exposure based on covariates     | 4130     | 235.66        | 241.87      | 14.08                           | 161.10         | 710.41         |
|                              |                                 | Exposure PT-adjusted             | 3582     | 244.92        | 254.34      | 18.95                           | 151.31         | 750.78         |
|                              |                                 | Exposure used in ER <sup>a</sup> | 4130     | 244.56        | 253.39      | 18.88                           | 151.31         | 750.78         |
|                              | C <sub>trough</sub> (µg/L)      | Exposure based on covariates     | 4130     | 94.96         | 99.48       | 26.39                           | 39.31          | 530.33         |
|                              |                                 | Exposure PT-adjusted             | 3582     | 118.76        | 131.04      | 42.81                           | 14.20          | 803.61         |
|                              |                                 | Exposure used in ER <sup>a</sup> | 4130     | 115.18        | 127.33      | 42.98                           | 14.20          | 803.61         |
| 20 mg o.d.                   | AUC <sub>0-24</sub><br>(µg/L*h) | Exposure based on covariates     | 3961     | 2508.44       | 2581.54     | 15.41                           | 1563.45        | 5188.89        |
|                              |                                 | Exposure PT-adjusted             | 3578     | 2673.50       | 2823.59     | 25.17                           | 1275.60        | 10 851.66      |
|                              |                                 | Exposure used in ER <sup>a</sup> | 3961     | 2660.29       | 2803.93     | 24.70                           | 1275.60        | 10 851.66      |
|                              | C <sub>max</sub> (µg/L)         | Exposure based on covariates     | 3961     | 221.00        | 224.44      | 11.10                           | 162.50         | 338.92         |
|                              |                                 | Exposure PT-adjusted             | 3578     | 229.68        | 236.61      | 17.45                           | 144.03         | 684.31         |
|                              |                                 | Exposure used in ER <sup>a</sup> | 3961     | 229.03        | 235.61      | 17.10                           | 144.03         | 684.31         |
|                              | C <sub>trough</sub> (µg/L)      | Exposure based on covariates     | 3961     | 25.07         | 26.49       | 35.81                           | 5.13           | 104.41         |
|                              |                                 | Exposure PT-adjusted             | 3578     | 31.05         | 35.08       | 53.01                           | 3.40           | 246.48         |

| Exposure used in ER <sup>a</sup>                                                                                                                                                                                                                                                                                                                 | 3961 | 30.30 | 34.35 | 52.75 | 3.40 | 246.48 |
|--------------------------------------------------------------------------------------------------------------------------------------------------------------------------------------------------------------------------------------------------------------------------------------------------------------------------------------------------|------|-------|-------|-------|------|--------|
| AUC <sub>0-24</sub> , area under the plasma concentration–time curve from 0 to 24 h; b.d., twice daily; C <sub>max</sub> , maximum concentration; C <sub>trough</sub> , trough concentration at the end of the dosing interval before the next dose; ER, exposure–response; o.d., once a day; PT, prothrombin time; VTE, venous thromboembolism. |      |       |       |       |      |        |

<sup>a</sup>Covariate-only estimates were used when PT adjustment could not be performed.
